# Supplementary material for: An extraction method for nitrogen isotope measurement of ammonium in a low-concentration environment
Source: Copernicus journal article supplement (doi:10.5194/amt-16-4015-2023), 2023-09-06

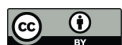

*Supplement of*

## **An extraction method for nitrogen isotope measurement of ammonium in a low-concentration environment**

**Alexis Lamothe et al.**

*Correspondence to:* Alexis Lamothe ([alexis.lamothe@univ-grenoble-alpes.fr](mailto:alexis.lamothe@univ-grenoble-alpes.fr)) and Joel Savarino ([joel.savarino@cnrs.fr](mailto:joel.savarino@cnrs.fr))

The copyright of individual parts of the supplement might differ from the article licence.

Figure S1: schematic isotopic mass balance on Nitrogen for  $N_2O_{\text{measured}}$

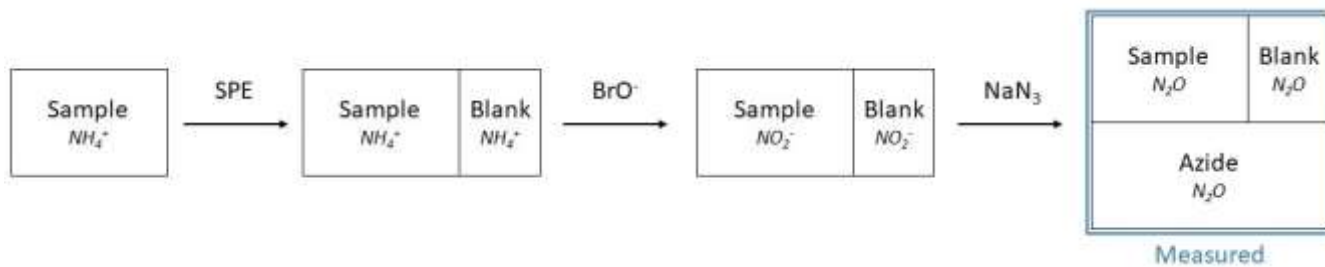

Supplement: Supplementary file 1 [file amt-16-4015-2023-supplement.pdf]
